# Supplementary material
Source: PubMed Central journal article supplement (PMC3703968)
Supplement: 1221009110_pnas.201221009SI.pdf [file 1221009110_pnas.201221009SI.pdf]

# Supporting Information

Zhang et al. 10.1073/pnas.1221009110

## Plasmids and Reagents

CUE domain-containing protein 2 (CUEDC2) full-length or truncated mutants were subcloned into pCDNA3.0-Flag, pXJ40-Myc, pMSCV-IRES-GFP, and pET28A vectors or as described before (1, 2). Site-directed mutagenesis of CUEDC2 [CUEDC2-KEN-box mutant (KM) and CUEDC2-D-box mutant (DM)] was done by standard methods. Myc-Cdh1 and Cdh1 deletion mutants were kindly provided by Marc W. Kirschner, Harvard Medical School, Boston, MA (3) and T. B. Kang, Sun Yat-Sen University Cancer Center, Guangzhou, China (4). Myc-Skp2 was a gift from Meloche Sylvain, Université de Montréal, Montréal, Canada (5), and pCDNA3.0-Cyclin A and GFP-Emi1 were from Peter K. Jackson, Department of Cell Regulation, Genentech Inc., South San Francisco, CA (6). Antibodies recognizing the following targets were obtained from commercial sources: HA (sc-7392), Myc (sc-40), Cyclin A (sc-751), Geminin (sc-13015), Skp2 (sc-7164), Cyclin-dependent kinase 2 (CDK2) (sc-163), p21 (sc-397), and p53 (sc-126) antibodies were purchased from Santa Cruz Biotechnology; Flag (F-3165), Tubulin (T5168), and BrdU (B3434) antibodies were from Sigma; Emi1 (38-5000) antibody was from Invitrogen; Cdh1 antibody (MS-1116-P0) was from Oncogene and Cdc27 antibody (610455) was from BD Biosciences. Mouse monoclonal antibody against CUEDC2 was prepared in our laboratory. Ubiquitin was from Boston Biochem; ATP, nocodazole, Taxol, thymidine, MG132, and cycloheximide were purchased from Sigma.

## Cell Culture and Transfection

HEK293T, HeLa, and U2OS cells were cultured in DMEM containing 10% FBS. MCF-10A cells were cultured in DMEM-F12 containing 5% horse serum (GIBCO), 10  $\mu$ g/mL insulin, 10 ng/mL EGF, 100 ng/mL cholera toxin, and 0.5  $\mu$ g/mL hydrocortisone. Plasmids were transfected by Lipofectamine 2000 (Invitrogen), and cells were harvested between 24 and 48 h after transfection. siRNAs from Invitrogen or Dharmacon were transfected by Lipofectamine RNAiMax (Invitrogen). The CUEDC2 siRNA (target sequence: 5'-CCAAGAUGAGGCAACUGGCGCUGAG-3') was from Invitrogen (no. HSS149051), and control siRNA was described as before. CUEDC2 shRNAs (#1 and #2) were inserted into the pSuper-retro-GFP vector, target sequences were as follows: 5'-GAAGCTGATCCGATACATC-3' and 5'-GTACATGATGGTGGATAGC-3', respectively. The Cdh1 siRNA was from Dharmacon and targeted to 5'-GAAGGGTCTGTTCACGTATTCCCTT-3'. Retroviral shRNA virus packaging and subsequent infection were performed as described previously.

## Immunoprecipitation and Immunoblotting

For CUEDC2 immunoprecipitation experiments, extracts from HeLa cells were prepared as described previously (1, 7), with slight modifications. Briefly, G<sub>1</sub>-phase cells were synchronized as described before and were harvested in SB buffer [25 mM Hepes, pH 7.5, 1.5 mM MgCl<sub>2</sub>, 5 mM KCl, 1 mM DTT, 1 $\times$  Complete protease inhibitors (Roche), 15 mM creatine phosphate, 2 mM ATP] and homogenized by freeze-thawing and passage through a needle. Extracts were cleared by subsequent centrifugations. Immunoprecipitation was performed with monoclonal anti-CUEDC2 antibody.

Proteins were separated by SDS/PAGE and analyzed by Western blotting with the indicated antibodies. For other immunoprecipitation experiments, cells were harvested in a Cdc20 lysis buffer (50 mM Tris-HCl, pH 7.5, 150 mM NaCl, 1 mM EDTA, 1 mM MgCl<sub>2</sub>, and 0.5% Nonidet P-40) supplemented with Complete protease inhibitor mixture, 1 mM NaF, 1 mM Na<sub>3</sub>VO<sub>4</sub>, and 1 mM DTT. Immunoprecipitation was performed with mouse anti-Flag M2 affinity gel, and proteins were separated by SDS/PAGE and analyzed by Western blotting with the indicated antibodies.

## Kinase Assay

For in vitro kinase assays of CDK2, harvested cells were lysed in Lysis buffer A, containing 50 mM Tris-HCl (pH 8.0), 150 mM NaCl, 1% Nonidet P-40, 10 mM *para*-nitrophenylphosphate (PNPP), 1 mM DTT, 1 mM Na<sub>3</sub>VO<sub>4</sub>, and protease inhibitors (Roche). Active Cdk2 complex was immunoprecipitated with antibodies to Cdk2 (Santa Cruz) coupling with protein A-Sepharose beads (GE Healthcare). Histone H1 (New England Biolabs), as the substrate, were incubated with active Cdk2 complex in Kinase buffer. The Kinase assays were performed in 20- $\mu$ L reactions, containing 50 mM Tris-HCl (pH 7.5), 10 mM MgCl<sub>2</sub>, 2 mM DTT, 20 mM  $\beta$ -glycerolphosphate, 20 mM PNPP, 10 mM NaF, 0.1 mM Na<sub>3</sub>VO<sub>4</sub>, 10  $\mu$ M cold ATP, 10  $\mu$ Ci of [ $\gamma$ -<sup>32</sup>P]ATP, protease inhibitors, 10  $\mu$ L of Cdk2 coupling beads, and 1  $\mu$ g Histone H1. The reactions were incubated at 30 °C for 30 min, quenched with SDS sample buffer, and analyzed by SDS/PAGE followed by autoradiography.

For in vitro kinase assays of ERK1/2, GST, GST-CUEDC2 (wild type), or GST-CUEDC2 (S110A) purified recombinant proteins were incubated with immunoprecipitated human ERK1/2 complex using MAP Kinase/ERK Immunoprecipitation Kinase Assay Kit (Millipore). The kinase assays were carried out in 30- $\mu$ L reactions, containing 50  $\mu$ M cold ATP, 5  $\mu$ Ci of [ $\gamma$ -<sup>32</sup>P]ATP, 10  $\mu$ L of ERK1/2 complex, and 1  $\mu$ g of purified recombinant proteins in kinase buffer. The reactions were incubated at 30 °C for 30 min, quenched with SDS sample buffer, and analyzed by SDS/PAGE followed by autoradiography.

## Protein Purification

All His-fusion proteins were expressed in *Escherichia coli* BL21 cells. His-CUEDC2 (WT) and His-CUEDC2 (KM) proteins were purified by Ni-NTA agarose (QIAGEN) resins. Cells were lysed in Lysis buffer, containing 50 mM Na<sub>2</sub>HPO<sub>4</sub>, 300 mM NaCl, 20 mM imidazole, and 1 mM PMSF, and the supernatants were incubated with Ni-NTA agarose resins for 4 h at 4 °C. The proteins were eluted by Elution buffer, containing 50 mM Na<sub>2</sub>HPO<sub>4</sub>, 300 mM NaCl, and 250 mM imidazole, and concentrated by Microcon centrifugal filter devices (Millipore).

## In Vitro Binding Assays

For in vitro binding assays, Flag-Cdh1 was translated in vitro with TNT T7 Quick Coupled Transcription/Translation System (Promega). The system was lysed in CDC20 buffer, lysates were incubated with Ni-NTA agarose (QIAGEN) resins-bound purified His-CUEDC2 (WT) or His-CUEDC2 (KM) for 2 h at 4 °C. The resins were washed three times with CDC20 buffer, and bound proteins were analyzed by SDS/PAGE.

1. Gao YF, et al. (2011) Cdk1-phosphorylated CUEDC2 promotes spindle checkpoint inactivation and chromosomal instability. *Nat Cell Biol* 13(8):924–933.
2. Zhang WN, et al. (2012) CUEDC2 (CUE domain-containing 2) and SOCS3 (suppressors of cytokine signaling 3) cooperate to negatively regulate Janus kinase 1/signal transducers and activators of transcription 3 signaling. *J Biol Chem* 287(1):382–392.

3. Wei W, et al. (2004) Degradation of the SCF component Skp2 in cell-cycle phase G1 by the anaphase-promoting complex. *Nature* 428(6979):194–198.
4. Lv XB, et al. (2010) Damaged DNA-binding protein 1 (DDB1) interacts with Cdh1 and modulates the function of APC/Cdh1. *J Biol Chem* 285(24):18234–18240.
5. Rodier G, et al. (2005) p107 inhibits G1 to S phase progression by down-regulating expression of the F-box protein Skp2. *J Cell Biol* 168(1):55–66.

6. Miller JJ, et al. (2006) Emi1 stably binds and inhibits the anaphase-promoting complex/cyclosome as a pseudosubstrate inhibitor. *Genes Dev* 20(17):2410–2420.

7. Frescas D, Pagano M (2008) Deregulated proteolysis by the F-box proteins SKP2 and beta-TrCP: Tipping the scales of cancer. *Nat Rev Cancer* 8(6):438–449.

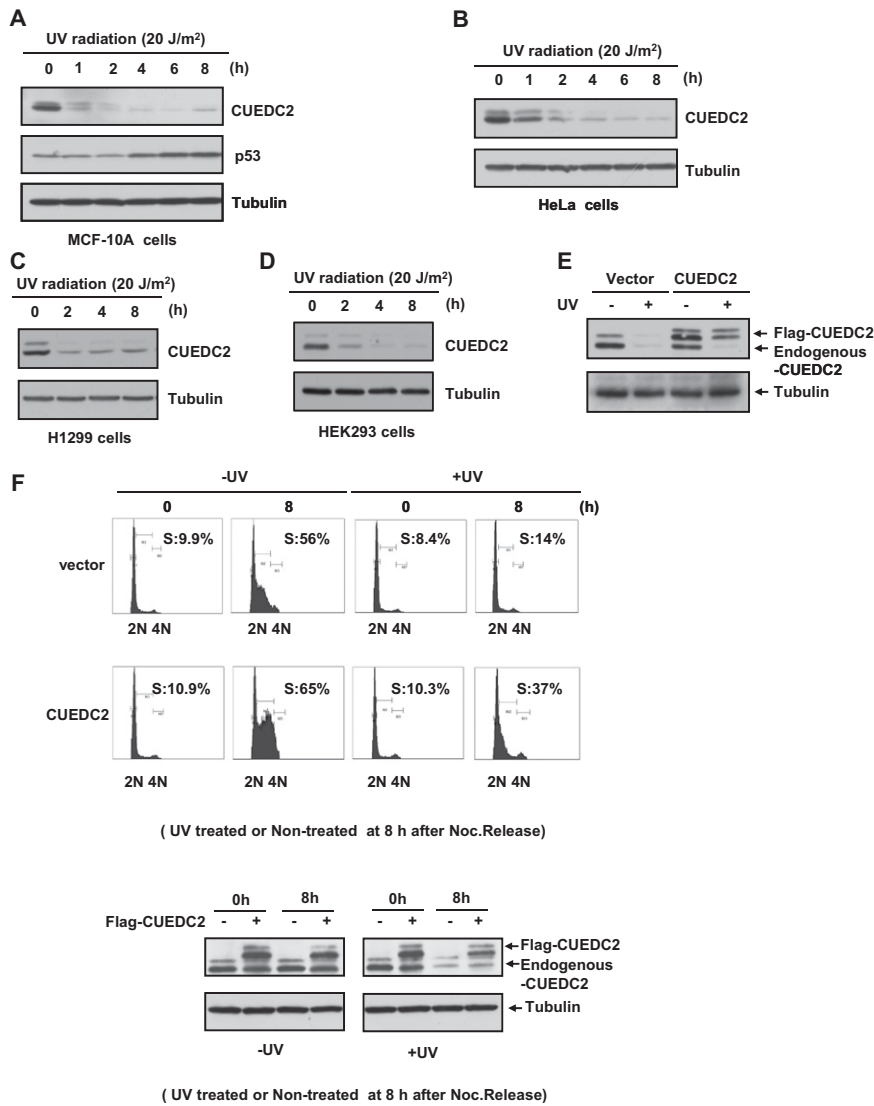

**Fig. S1.** CUEDC2 is degraded during UV-induced G<sub>1</sub> arrest and its overexpression overcomes such an arrest. (A–D) U2OS, HeLa, H1299, and HEK293 cells were treated with UV-C (20 J/m<sup>2</sup>) irradiation and harvested at indicated times, and CUEDC2 protein levels were determined by immunoblotting. (E) CUEDC2 protein levels were detected in Fig. 1D. (F) FACS analysis and S-phase percentage of cells in Fig. 1E. The exogenous and endogenous CUEDC2 protein levels are shown at *Bottom*.







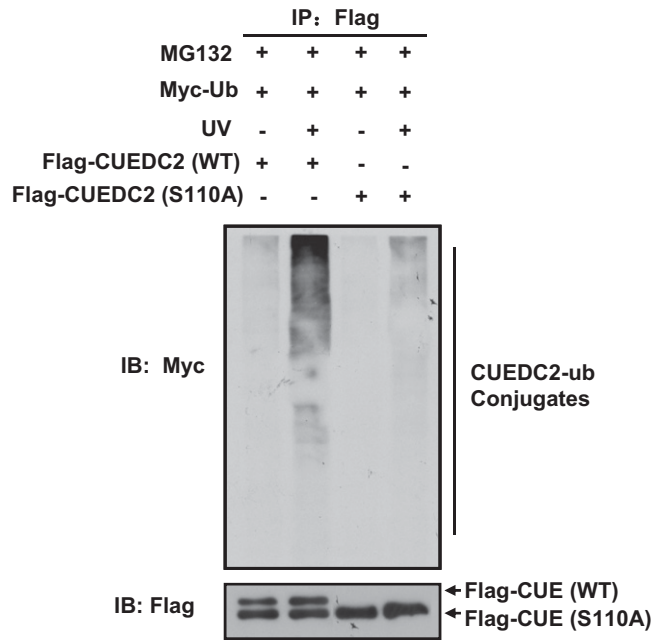

**Fig. S6.** The ubiquitination of CUEDC2 S110A mutant was decreased upon UV irradiation. Myc-tagged ubiquitin and Flag-tagged CUEDC2 (WT) or CUEDC2 (S110A) was cotransfected into HEK293T cells. Cells were exposed to UV-C ( $20 \text{ J/m}^2$ ) irradiation at 24 h after transfection and harvested at 4 h after UV treatment. Flag-tagged proteins were pulled down by anti-Flag M2 beads, and then detected by immunoblotting using anti-Myc antibody.
